# Supplementary material for: Multivariate Null Hypothesis Testing Using Continuous ABC Recording Measures with Bayesian Statistics for Severe Problem Behaviors Across Settings: Case Report
Source: Research Square preprint supplement (doi:10.21203/rs.3.rs-6398022/v1), 2025-04-10
Supplement: Supplementary file 1 [file 089abe585c7beb86239a606d.xlsx]

## Sheet: Individual Demands
Date	Comp	ATO	SIB	PD	OA	IV	ST		NC	AR-Escape	AR Help	R+	P+	Total	Compliance	ATO	SIB	PD	OA	IV	ST	ARA	Behaviors of Noncompliance	Appropriate Requests for Break/Escape	Appropriate Requests for Help	Tangible	Attention R+	Appropriate Responses	Rate	Time
2021-09-03	6	0	0	0	0	0	0	0	0	0	0	0	4	6	1	0	0	0	0	0	0	0	0	0	0	0	0.666667	1	9.65147	0.621667
2021-09-28	44	0	0	0	0	1	9	0	0	0	0	0	19	54	0.814815	0	0	0	0	0.0185185	0.166667	0	0	0	0	0	0.431818	0.814815	46.6859	1.15667
2021-10-19	10	0	0	0	0	0	0	0	0	0	0	0	2	10	1	0	0	0	0	0	0	0	0	0	0	0	0.2	1	15.1515	0.66
2021-10-28	22	0	0	0	0	1	0	0	0	0	0	0	5	23	0.956522	0	0	0	0	0.0434783	0	0	0	0	0	0	0.227273	0.956522		0
2021-11-11	0	0	0	0	0	0	0	0	0	0	0	0	0	0															0	0.413333
2021-12-02	24	0	0	0	0	0	0	0	2	0	0	1	8	26	0.923077	0	0	0	0	0	0	0	0.0769231	0	0	0.0416667	0.333333	0.923077	22.6415	1.14833
2021-12-16	16	0	0	0	0	0	0	0	1	0	0	0	7	17	0.941176	0	0	0	0	0	0	0	0.0588235	0	0	0	0.4375	0.941176	20.4819	0.83
2021-12-23	11	0	0	0	0	0	1	0	0	0	0	0	6	12	0.916667	0	0	0	0	0	0.0833333	0	0	0	0	0	0.545455	0.916667	13.3829	0.896667
2022-01-05	54	0	0	0	0	0	1	0	2	0	3	1	39	60	0.9	0	0	0	0	0	0.0166667	0	0.0333333	0	0.05	0.0185185	0.722222	0.95	116.883	0.513333
2022-01-12	8	0	0	0	0	0	0	0	1	0	1	0	6	10	0.8	0	0	0	0	0	0	0	0.1	0	0.1	0	0.75	0.9	12.22	0.818333
2022-01-21	168	0	1	2	0	0	17	0	2	0	1	6	57	191	0.879581	0	0.0052356	0.0104712	0	0	0.0890052	0	0.0104712	0	0.0052356	0.0357143	0.339286	0.884817	192.929	0.99
2022-01-25	145	0	0	0	0	0	2	0	1	0	0	2	61	148	0.97973	0	0	0	0	0	0.0135135	0	0.00675676	0	0	0.0137931	0.42069	0.97973	149.495	0.99
2022-03-23	33	0	0	0	0	0	0	0	0	0	3	0	9	36	0.916667	0	0	0	0	0	0	0	0	0	0.0833333	0	0.272727	1	109.091	0.33
2022-03-28	66	0	0	0	0	0	2	0	11	0	1	0	21	80	0.825	0	0	0	0	0	0.025	0	0.1375	0	0.0125	0	0.318182	0.8375	121.212	0.66
2022-09-21	24	0	0	0	0	0	0	0	5	0	0	1	13	29	0.827586	0	0	0	0	0	0	0	0.172414	0	0	0.0416667	0.541667	0.827586	60.4167	0.48
2022-09-23	16	0	0	0	0	0	1	0	0	0	0	0	12	17	0.941176	0	0	0	0	0	0.0588235	0	0	0	0	0	0.75	0.941176	19.3916	0.876667
2022-09-27	76	0	0	0	0	0	0	0	23	0	17	0	33	116	0.655172	0	0	0	0	0	0	0	0.198276	0	0.146552	0	0.434211	0.801724	106.098	1.09333
2022-10-06	24	0	0	0	0	0	0	0	12	0	1	3	12	37	0.648649	0	0	0	0	0	0	0	0.324324	0	0.027027	0.125	0.5	0.675676	56.0606	0.66
2022-10-21	13	0	0	0	0	0	1	0	1	0	6	0	4	21	0.619048	0	0	0	0	0	0.047619	0	0.047619	0	0.285714	0	0.307692	0.904762	27.6316	0.76
2022-10-28	3	0	0	0	0	0	0	0	1	0	2	0	1	6	0.5	0	0	0	0	0	0	0	0.166667	0	0.333333	0	0.333333	0.833333	9.09091	0.66
2022-11-11	10	0	0	0	0	0	0	0	0	0	0	1	6	10	1	0	0	0	0	0	0	0	0	0	0	0.1	0.6	1	16.3043	0.613333
2022-11-15	64	0	0	0	1	0	4	0	0	1	1	1	25	71	0.901408	0	0	0	0.0140845	0	0.056338	0	0	0.0140845	0.0140845	0.015625	0.390625	0.929577	71.7172	0.99
2022-11-22	50	0	0	0	0	0	0	0	0	0	0	3	15	50	1	0	0	0	0	0	0	0	0	0	0	0.06	0.3	1	59.8802	0.835
2022-12-02	52	0	0	0	0	0	2	0	0	0	7	2	17	61	0.852459	0	0	0	0	0	0.0327869	0	0	0	0.114754	0.0384615	0.326923	0.967213	49.1935	1.24
2022-12-06	14	0	0	0	0	0	1	0	0	0	2	0	12	17	0.823529	0	0	0	0	0	0.0588235	0	0	0	0.117647	0	0.857143	0.941176	37.7778	0.45
2022-12-21	18	0	0	0	0	0	0	0	0	1	0	0	6	19	0.947368	0	0	0	0	0	0	0	0	0.0526316	0	0	0.333333	1	28.7879	0.66
2023-01-06	40	0	0	0	1	1	0	0	4	1	2	0	2	49	0.816327	0	0	0	0.0204082	0.0204082	0	0	0.0816327	0.0204082	0.0408163	0	0.05	0.877551	74.2424	0.66
2023-01-30	66	0	0	0	0	0	0	0	0	0	0	0	18	66	1	0	0	0	0	0	0	0	0	0	0	0	0.272727	1	100	0.66
2023-02-10	7	0	0	0	0	0	1	0	0	0	1	0	1	9	0.777778	0	0	0	0	0	0.111111	0	0	0	0.111111	0	0.142857	0.888889	27.2727	0.33
2022-02-08	17	0	0	0	0	0	0	0	0	0	0	0	10	17	1	0	0	0	0	0	0	0	0	0	0	0	0.588235	1	51.5152	0.33
2023-03-06	14	0	0	0	0	0	0	0	0	1	4	0	7	19	0.736842	0	0	0	0	0	0	0	0	0.0526316	0.210526	0	0.5	1	48.927	0.388333
2023-03-24	3	0	0	0	0	0	0	0	0	0	0	0	2	3	1	0	0	0	0	0	0	0	0	0	0	0	0.666667	1	18	0.166667
2021-05-31	5	0	0	0	0	1	1	0	0	1	0	0	1	8	0.625	0	0	0	0	0.125	0.125	0	0	0.125	0	0	0.2	0.75	24.2424	0.33
2021-06-16	2	0	0	0	0	2	0	0	0	0	0	0	0	4	0.5	0	0	0	0	0.5	0	0	0	0	0	0	0	0.5	4.0404	0.99
2021-11-08	2	0	0	0	0	2	0	0	0	0	0	1	1	4	0.5	0	0	0	0	0.5	0	0	0	0	0	0.5	0.5	0.5	12.1212	0.33
2021-12-08	10	0	0	0	0	0	0	0	0	0	3	1	2	13	0.769231	0	0	0	0	0	0	0	0	0	0.230769	0.1	0.2	1	43.3333	0.3
2022-06-07	8	0	0	0	0	0	1	0	0	0	0	0	5	9	0.888889	0	0	0	0	0	0.111111	0	0	0	0	0	0.625	0.888889	27.2727	0.33
2023-04-14	34	0	0	0	0	0	0	0	0	0	0	0	3	34	1	0	0	0	0	0	0	0	0	0	0	0	0.0882353	1	41.5479	0.818333
2023-05-01	23	0	0	0	0	0	1	0	0	0	0	0	4	24	0.958333	0	0	0	0	0	0.0416667	0	0	0	0	0	0.173913	0.958333	30.444	0.788333
2023-05-12	26	0	0	0	0	0	0	0	0	1	0	0	10	27	0.962963	0	0	0	0	0	0	0	0	0.037037	0	0	0.384615	1	54.3624	0.496667
2023-05-25	3	0	0	0	0	0	0	0	0	0	0	0	1	3	1	0	0	0	0	0	0	0	0	0	0	0	0.333333	1	4.54545	0.66
2023-07-19	47	0	0	0	0	0	0	0	5	1	0	0	32	53	0.886792	0	0	0	0	0	0	0	0.0943396	0.0188679	0	0	0.680851	0.90566	106.711	0.496667
2023-09-06	53	0	0	0	1	0	0	0	1	2	0	0	19	57	0.929825	0	0	0	0.0175439	0	0	0	0.0175439	0.0350877	0	0	0.358491	0.964912	86.3636	0.66
2023-09-15	38	0	0	0	0	0	0	0	1	1	5	0	6	45	0.844444	0	0	0	0	0	0	0	0.0222222	0.0222222	0.111111	0	0.157895	0.977778	70.3125	0.64
2023-09-20	11	0	0	0	0	0	0	0	0	0	0	0	5	11	1	0	0	0	0	0	0	0	0	0	0	0	0.454545	1	16.6667	0.66
2023-09-27	2	0	0	0	0	0	0	0	0	0	0	0	0	2	1	0	0	0	0	0	0	0	0	0	0	0	0	1	8	0.25
2023-10-04	30	0	0	0	0	0	0	0	0	0	3	0	8	33	0.909091	0	0	0	0	0	0	0	0	0	0.0909091	0	0.266667	1	61.3003	0.538333
2023-10-31	56	0	0	0	0	0	0	0	0	1	7	0	7	64	0.875	0	0	0	0	0	0	0	0	0.015625	0.109375	0	0.125	1	88.0734	0.726667
2023-11-10	51	0	0	0	0	0	4	0	0	0	2	0	11	57	0.894737	0	0	0	0	0	0.0701754	0	0	0	0.0350877	0	0.215686	0.929825	89.0625	0.64
2023-11-15	26	0	0	0	0	0	1	0	0	0	1	0	8	28	0.928571	0	0	0	0	0	0.0357143	0	0	0	0.0357143	0	0.307692	0.964286	43.75	0.64
2023-12-06	30	0	0	0	0	0	0	0	0	0	1	0	5	31	0.967742	0	0	0	0	0	0	0	0	0	0.0322581	0	0.166667	1	64.5833	0.48
2023-12-13	27	0	0	0	0	0	0	0	0	0	1	0	7	28	0.964286	0	0	0	0	0	0	0	0	0	0.0357143	0	0.259259	1	74.0088	0.378333
2023-12-20	14	0	0	0	0	0	1	0	0	0	0	0	5	15	0.933333	0	0	0	0	0	0.0666667	0	0	0	0	0	0.357143	0.933333	37.9747	0.395
2023-01-03	8	0	0	0	0	0	0	0	0	0	0	0	2	8	1	0	0	0	0	0	0	0	0	0	0	0	0.25	1	25	0.32
2024-01-05	23	0	0	0	0	0	0	0	0	0	0	0	2	23	1	0	0	0	0	0	0	0	0	0	0	0	0.0869565	1	75	0.306667
2024-01-10	9	0	0	0	0	0	0	0	0	0	0	0	3	9	1	0	0	0	0	0	0	0	0	0	0	0	0.333333	1	14.0625	0.64
2024-01-22	2	0	0	0	0	0	0	0	0	0	0	0	2	2	1	0	0	0	0	0	0	0	0	0	0	0	1	1	12.5	0.16
2024-04-12	0	0	0	0	0	0	0	0	0	0	0	0	0	0															0.483263	0.0832626
2024-04-17	5	0	0	0	0	0	1	0	0	0	0	0	5	6	0.833333	0	0	0	0	0	0.166667	0	0	0	0	0	1	0.833333	5.60748	1.07
2024-05-08	3	0	0	0	0	0	0	0	0	0	0	0	1	3	1	0	0	0	0	0	0	0	0	0	0	0	0.333333	1	4.6875	0.64
2024-05-17	50	0	0	0	0	0	0	0	1	1	3	0	28	55	0.909091	0	0	0	0	0	0	0	0.0181818	0.0181818	0.0545455	0	0.56	0.981818	65.2174	0.843333
2024-05-21	64	0	0	0	0	0	0	0	1	0	2	0	23	67	0.955224	0	0	0	0	0	0	0	0.0149254	0	0.0298507	0	0.359375	0.985075	139.583	0.48
2024-11-08	23	0	0	0	0	0	0	0	0	0	1	0	7	24	0.958333	0	0	0	0	0	0	0	0	0	0.0416667	0	0.304348	1	37.5	0.64
2024-11-21	8	0	0	0	0	0	0	0	0	0	0	0	1	8	1	0	0	0	0	0	0	0	0	0	0	0	0.125	1	16.6667	0.48
2024-12-12	30	0	0	0	0	0	0	0	0	0	6	0	3	36	0.833333	0	0	0	0	0	0	0	0	0	0.166667	0	0.1	1	72.4832	0.496667
2025-02-26	20	0	0	0	0	0	0	0	0	0	0	0	4	20	1	0	0	0	0	0	0	0	0	0	0	0	0.2	1	41.6667	0.48
2025-03-05	6	0	0	0	0	0	0	0	1	0	0	0	0	7	0.857143	0	0	0	0	0	0	0	0.142857	0	0	0	0	0.857143	15.8491	0.441667
2025-03-12	28	0	0	0	0	0	0	0	0	0	1	0	3	29	0.965517	0	0	0	0	0	0	0	0	0	0.0344828	0	0.107143	1	90.625	0.32
2025-03-19	3	0	0	0	0	0	0	0	0	0	0	0	1	3	1	0	0	0	0	0	0	0	0	0	0	0	0.333333	1	9.375	0.32

## Sheet: Behaviors
Date	10_Minutes	ATO	SIB	PD	OA	IV	ST	NC	NO BX	ATO	SIB	PD	OA	IV	ST	NC	NO BX
2021-09-03	4	0	0	0	4	2	1	4	0	0	0	0	1	0.5	0.25	1	0
2021-09-28	8	0	0	0	8	5	6	2	0	0	0	0	1	0.625	0.75	0.25	0
2021-10-19	5	0	0	0	5	4	1	2	0	0	0	0	1	0.8	0.2	0.4	0
2021-10-28	5	0	0	0	3	3	3	2	0	0	0	0	0.6	0.6	0.6	0.4	0
2021-11-11	4	0	0	0	4	4	2	1	0	0	0	0	1	1	0.5	0.25	0
2021-12-02	6	0	0	0	5	1	3	3	0	0	0	0	0.833333	0.166667	0.5	0.5	0
2021-12-16	6	0	0	0	5	3	0	0	1	0	0	0	0.833333	0.5	0	0	0.166667
2021-12-23	6	0	0	0	4	2	1	0	0	0	0	0	0.666667	0.333333	0.166667	0	0
2022-01-05	5	0	0	0	3	1	1	0	1	0	0	0	0.6	0.2	0.2	0	0.2
2022-01-12	6	0	0	0	6	4	2	3	0	0	0	0	1	0.666667	0.333333	0.5	0
2022-01-21	4	0	0	0	3	0	2	1	1	0	0	0	0.75	0	0.5	0.25	0.25
2022-01-25	6	0	0	0	5	2	4	3	0	0	0	0	0.833333	0.333333	0.666667	0.5	0
2022-03-23	2	0	0	0	2	0	2	0	0	0	0	0	1	0	1	0	0
2022-03-28	6	0	0	0	5	1	3	2	0	0	0	0	0.833333	0.166667	0.5	0.333333	0
2022-09-21	4	0	0	0	1	1	0	2	1	0	0	0	0.25	0.25	0	0.5	0.25
2022-09-23	5	0	0	1	3	4	2	1	1	0	0	0.2	0.6	0.8	0.4	0.2	0.2
2022-09-27	6	0	0	0	6	0	5	2	0	0	0	0	1	0	0.833333	0.333333	0
2022-10-06	2	0	1	0	2	0	0	2	0	0	0.5	0	1	0	0	1	0
2022-10-21	8	0	1	0	8	4	8	4	0	0	0.125	0	1	0.5	1	0.5	0
2022-10-28	3	0	0	0	3	2	1	3	0	0	0	0	1	0.666667	0.333333	1	0
2022-11-11	4	0	0	0	4	4	3	2	0	0	0	0	1	1	0.75	0.5	0
2022-11-15	6	0	1	0	4	2	6	4	0	0	0.166667	0	0.666667	0.333333	1	0.666667	0
2022-11-22	4	0	0	0	4	2	4	3	0	0	0	0	1	0.5	1	0.75	0
2022-12-02	6	0	2	2	4	1	6	2	0	0	0.333333	0.333333	0.666667	0.166667	1	0.333333	0
2022-12-06	5	0	1	1	5	3	3	1	0	0	0.2	0.2	1	0.6	0.6	0.2	0
2022-12-21	3	0	0	1	3	2	1	0	1	0	0	0.333333	1	0.666667	0.333333	0	0.333333
2023-01-06	4	0	1	0	0	0	1	0	3	0	0.25	0	0	0	0.25	0	0.75
2023-01-30	3	0	0	0	1	2	2	1	0	0	0	0	0.333333	0.666667	0.666667	0.333333	0
2023-02-10	2	0	0	0	2	1	0	0	0	0	0	0	1	0.5	0	0	0
2022-02-08	0	0	0	0	0	0	0	0	0	#DIV/0!	#DIV/0!	#DIV/0!	#DIV/0!	#DIV/0!	#DIV/0!	#DIV/0!	#DIV/0!
2023-03-06	3	0	0	0	2	1	0	1	1	0	0	0	0.666667	0.333333	0	0.333333	0.333333
2023-03-24	4	0	0	1	4	2	1	1	0	0	0	0.25	1	0.5	0.25	0.25	0
2021-05-31	7	0	3	2	5	5	6	4	0	0	0.428571	0.285714	0.714286	0.714286	0.857143	0.571429	0
2021-06-16	0	0	0	0	0	0	0	0	0	#DIV/0!	#DIV/0!	#DIV/0!	#DIV/0!	#DIV/0!	#DIV/0!	#DIV/0!	#DIV/0!
2021-11-08	0	0	0	0	0	0	0	0	0	#DIV/0!	#DIV/0!	#DIV/0!	#DIV/0!	#DIV/0!	#DIV/0!	#DIV/0!	#DIV/0!
2021-12-08	2	0	0	0	1	2	2	0	0	0	0	0	0.5	1	1	0	0
2022-06-07	2	0	0	0	2	2	2	0	0	0	0	0	1	1	1	0	0
2023-04-14	4	0	4	0	2	0	4	0	0	0	1	0	0.5	0	1	0	0
2023-05-01	4	0	0	0	4	3	3	0	0	0	0	0	1	0.75	0.75	0	0
2023-05-12	4	0	0	2	3	2	4	0	0	0	0	0.5	0.75	0.5	1	0	0
2023-05-25	6	0	1	1	2	2	6	2	2	0	0.166667	0.166667	0.333333	0.333333	1	0.333333	0.333333
2023-07-19	2	0	1	0	1	1	2	0	0	0	0.5	0	0.5	0.5	1	0	0
2023-09-06	2	0	0	0	2	1	2	1	0	0	0	0	1	0.5	1	0.5	0
2023-09-15	2	0	1	0	2	2	2	0	0	0	0.5	0	1	1	1	0	0
2023-09-20	4	0	0	0	0	0	3	0	4	0	0	0	0	0	0.75	0	1
2023-09-27	1	0	0	0	0	0	1	1	0	0	0	0	0	0	1	1	0
2023-10-04	3	0	0	0	0	0	3	0	3	0	0	0	0	0	1	0	1
2023-10-31	4	0	0	0	0	1	2	0	3	0	0	0	0	0.25	0.5	0	0.75
2023-11-10	4	0	0	0	0	0	3	1	3	0	0	0	0	0	0.75	0.25	0.75
2023-11-15	4	0	0	0	0	0	4	0	0	0	0	0	0	0	1	0	0
2023-12-06	2	0	0	0	0	0	2	1	0	0	0	0	0	0	1	0.5	0
2023-12-13	2	0	0	0	0	0	1	0	2	0	0	0	0	0	0.5	0	1
2023-12-20	1	0	0	0	0	0	1	0	1	0	0	0	0	0	1	0	1
2023-01-03	2	0	0	0	0	0	2	0	2	0	0	0	0	0	1	0	1
2024-01-05	1	0	0	0	1	0	1	0	0	0	0	0	1	0	1	0	0
2024-01-10	4	0	0	0	0	0	4	0	4	0	0	0	0	0	1	0	1
2024-01-22	1	0	0	0	0	0	1	0	1	0	0	0	0	0	1	0	1
2024-04-12	3	0	0	0	0	0	3	0	3	0	0	0	0	0	1	0	1
2024-04-17	6	0	1	1	0	0	6	1	4	0	0.166667	0.166667	0	0	1	0.166667	0.666667
2024-05-08	4	0	0	0	0	0	4	0	4	0	0	0	0	0	1	0	1
2024-05-17	5	0	0	0	0	0	2	2	3	0	0	0	0	0	0.4	0.4	0.6
2024-05-21	3	0	0	0	0	0	3	0	3	0	0	0	0	0	1	0	1
2024-11-08	4	0	0	0	0	0	4	0	4	0	0	0	0	0	1	0	1
2024-11-21	3	0	0	0	0	0	2	0	3	0	0	0	0	0	0.666667	0	1
2024-12-12	3	0	0	0	0	0	3	0	2	0	0	0	0	0	1	0	0.666667
2025-02-26	3	0	0	0	0	0	1	0	3	0	0	0	0	0	0.333333	0	1
2025-03-05	2	0	0	0	0	0	1	1	1	0	0	0	0	0	0.5	0.5	0.5
2025-03-12	2	0	0	0	0	0	1	0	2	0	0	0	0	0	0.5	0	1
2025-03-19	2	0	0	0	0	0	1	0	2	0	0	0	0	0	0.5	0	1

## Sheet: Social Demands
Date	Comp	ATO	SIB	PD	OA	IV	ST	ARA	NC	AR-Escape	AR Help	R+	P+	Total	Compliance	ATO	SIB	PD	OA	IV	ST	ARA	BX of Noncomp	Appropriate Requests for Break/Escape	Appropriate Requests for Help	Tangible	Attention R+	Appropriate Responses	Rate Social Demands
2021-09-03	0	0	0	0	0	0	0	0	0	0	0	0	0	0															0
2021-09-28	2	0	0	0	0	1	8	0	4	0	0	0	2	15	0.133333	0	0	0	0	0.0666667	0.533333	0	0.266667	0	0	0	1	0.133333	12.9683
2021-10-19	6	0	0	0	0	0	0	0	2	0	0	0	4	8	0.75	0	0	0	0	0	0	0	0.25	0	0	0	0.666667	0.75	12.1212
2021-10-28	0	0	0	0	0	0	0	0	2	0	0	0	0	2	0	0	0	0	0	0	0	0	1	0	0			0	#DIV/0!
2021-11-11	1	0	0	0	0	0	0	0	1	0	0	0	1	2	0.5	0	0	0	0	0	0	0	0.5	0	0	0	1	0.5	4.83871
2021-12-02	14	0	0	0	0	0	2	0	4	0	0	1	9	20	0.7	0	0	0	0	0	0.1	0	0.2	0	0	0.0714286	0.642857	0.7	17.4165
2021-12-16	16	0	0	0	0	0	0	0	5	0	1	0	6	22	0.727273	0	0	0	0	0	0	0	0.227273	0	0.0454545	0	0.375	0.772727	26.506
2021-12-23	29	0	0	0	0	0	4	0	1	0	2	0	7	36	0.805556	0	0	0	0	0	0.111111	0	0.0277778	0	0.0555556	0	0.241379	0.861111	40.1487
2022-01-05	6	0	0	0	0	0	0	0	5	0	0	0	5	11	0.545455	0	0	0	0	0	0	0	0.454545	0	0	0	0.833333	0.545455	21.4286
2022-01-12	7	0	0	0	0	1	2	0	3	0	0	0	6	13	0.538462	0	0	0	0	0.0769231	0.153846	0	0.230769	0	0	0	0.857143	0.538462	15.8859
2022-01-21	35	0	0	0	0	0	8	0	6	0	2	0	19	51	0.686275	0	0	0	0	0	0.156863	0	0.117647	0	0.0392157	0	0.542857	0.72549	51.5152
2022-01-25	17	0	0	0	0	0	2	0	3	0	1	0	9	23	0.73913	0	0	0	0	0	0.0869565	0	0.130435	0	0.0434783	0	0.529412	0.782609	23.2323
2022-03-23	0	0	0	0	0	0	0	0	0	0	1	0	0	1	0	0	0	0	0	0	0	0	0	0	1			1	3.0303
2022-03-28	25	0	0	0	0	0	5	0	4	0	1	1	11	35	0.714286	0	0	0	0	0	0.142857	0	0.114286	0	0.0285714	0.04	0.44	0.742857	53.0303
2022-09-21	16	0	0	0	0	0	1	0	1	0	0	0	7	18	0.888889	0	0	0	0	0	0.0555556	0	0.0555556	0	0	0	0.4375	0.888889	37.5
2022-09-23	146	0	0	0	0	0	27	0	9	0	0	5	43	182	0.802198	0	0	0	0	0	0.148352	0	0.0494505	0	0	0.0342466	0.294521	0.802198	207.605
2022-09-27	20	0	0	0	0	0	2	0	2	0	0	2	5	24	0.833333	0	0	0	0	0	0.0833333	0	0.0833333	0	0	0.1	0.25	0.833333	21.9512
2022-10-06	33	0	0	0	2	0	0	0	1	0	1	0	14	37	0.891892	0	0	0	0.0540541	0	0	0	0.027027	0	0.027027	0	0.424242	0.918919	56.0606
2022-10-21	56	0	0	0	0	0	0	0	3	0	3	3	19	62	0.903226	0	0	0	0	0	0	0	0.0483871	0	0.0483871	0.0535714	0.339286	0.951613	81.5789
2022-10-28	11	0	0	0	0	0	0	0	1	0	1	0	3	13	0.846154	0	0	0	0	0	0	0	0.0769231	0	0.0769231	0	0.272727	0.923077	19.697
2022-11-11	69	0	0	0	0	0	17	0	5	16	6	5	29	113	0.610619	0	0	0	0	0	0.150442	0	0.0442478	0.141593	0.0530973	0.0724638	0.42029	0.80531	184.239
2022-11-15	20	0	0	0	0	0	1	0	1	1	0	0	6	23	0.869565	0	0	0	0	0	0.0434783	0	0.0434783	0.0434783	0	0	0.3	0.913043	23.2323
2022-11-22	21	0	0	0	0	0	1	0	1	0	0	0	15	23	0.913043	0	0	0	0	0	0.0434783	0	0.0434783	0	0	0	0.714286	0.913043	27.5449
2022-12-02	43	0	0	0	0	0	3	0	6	21	3	1	13	76	0.565789	0	0	0	0	0	0.0394737	0	0.0789474	0.276316	0.0394737	0.0232558	0.302326	0.881579	61.2903
2022-12-06	22	0	0	0	0	0	4	0	0	0	2	0	11	28	0.785714	0	0	0	0	0	0.142857	0	0	0	0.0714286	0	0.5	0.857143	62.2222
2022-12-21	16	0	0	0	0	0	1	0	0	1	0	0	5	18	0.888889	0	0	0	0	0	0.0555556	0	0	0.0555556	0	0	0.3125	0.944444	27.2727
2023-01-06	40	0	0	0	0	0	2	0	0	0	0	1	12	42	0.952381	0	0	0	0	0	0.047619	0	0	0	0	0.025	0.3	0.952381	63.6364
2023-01-30	3	0	0	0	0	0	0	0	1	0	0	0	1	4	0.75	0	0	0	0	0	0	0	0.25	0	0	0	0.333333	0.75	6.06061
2023-02-10	83	0	0	0	0	0	1	0	5	0	3	0	30	92	0.902174	0	0	0	0	0	0.0108696	0	0.0543478	0	0.0326087	0	0.361446	0.934783	278.788
2022-02-08	0	0	0	0	0	0	0	0	1	0	0	0	0	1	0	0	0	0	0	0	0	0	1	0	0			0	3.0303
2023-03-06	21	0	0	0	0	0	0	0	3	2	0	0	15	26	0.807692	0	0	0	0	0	0	0	0.115385	0.0769231	0	0	0.714286	0.884615	66.9528
2023-03-24	7	0	0	0	0	0	0	0	0	1	0	0	3	8	0.875	0	0	0	0	0	0	0	0	0.125	0	0	0.428571	1	48
2021-05-31	0	0	0	0	0	0	0	0	0	0	0	0	0	0															0
2021-06-16	3	0	0	0	0	5	1	0	6	0	0	0	1	15	0.2	0	0	0	0	0.333333	0.0666667	0	0.4	0	0	0	0.333333	0.2	22.7273
2021-11-08	1	0	0	0	0	0	1	0	0	0	0	0	1	2	0.5	0	0	0	0	0	0.5	0	0	0	0	0	1	0.5	6.06061
2021-12-08	5	0	0	0	0	0	1	0	3	0	0	0	2	9	0.555556	0	0	0	0	0	0.111111	0	0.333333	0	0	0	0.4	0.555556	30
2022-06-07	9	0	0	0	0	0	5	0	2	0	0	0	3	16	0.5625	0	0	0	0	0	0.3125	0	0.125	0	0	0	0.333333	0.5625	48.4848
2023-04-14	5	0	0	0	0	0	0	0	0	0	0	0	2	5	1	0	0	0	0	0	0	0	0	0	0	0	0.4	1	6.10998
2023-05-01	13	0	0	0	0	0	0	0	1	0	0	0	2	14	0.928571	0	0	0	0	0	0	0	0.0714286	0	0	0	0.153846	0.928571	17.759
2023-05-12	28	0	0	0	0	0	2	0	1	1	4	0	12	36	0.777778	0	0	0	0	0	0.0555556	0	0.0277778	0.0277778	0.111111	0	0.428571	0.916667	72.4832
2023-05-25	13	0	0	0	0	0	0	0	2	0	0	0	8	15	0.866667	0	0	0	0	0	0	0	0.133333	0	0	0	0.615385	0.866667	22.7273
2023-07-19	41	0	0	0	0	0	2	0	3	0	4	0	21	50	0.82	0	0	0	0	0	0.04	0	0.06	0	0.08	0	0.512195	0.9	100.671
2023-09-06	15	0	0	0	0	0	0	0	2	0	0	0	10	17	0.882353	0	0	0	0	0	0	0	0.117647	0	0	0	0.666667	0.882353	25.7576
2023-09-15	25	0	0	0	0	0	0	0	1	0	0	0	6	26	0.961538	0	0	0	0	0	0	0	0.0384615	0	0	0	0.24	0.961538	40.625
2023-09-20	88	0	0	0	0	0	16	0	1	0	6	0	28	111	0.792793	0	0	0	0	0	0.144144	0	0.00900901	0	0.0540541	0	0.318182	0.846847	168.182
2023-09-27	3	0	0	0	0	0	0	0	0	0	0	0	1	3	1	0	0	0	0	0	0	0	0	0	0	0	0.333333	1	12
2023-10-04	55	0	0	0	0	0	2	0	6	0	1	0	27	64	0.859375	0	0	0	0	0	0.03125	0	0.09375	0	0.015625	0	0.490909	0.875	118.885
2023-10-31	96	0	0	0	0	0	6	0	7	0	3	0	40	112	0.857143	0	0	0	0	0	0.0535714	0	0.0625	0	0.0267857	0	0.416667	0.883929	154.128
2023-11-10	3	0	0	0	0	0	1	0	0	0	0	2	5	4	0.75	0	0	0	0	0	0.25	0	0	0	0	0.666667	1.66667	0.75	6.25
2023-11-15	42	0	0	0	0	0	0	0	0	4	0	19	50	46	0.913043	0	0	0	0	0	0	0	0	0.0869565	0	0.452381	1.19048	1	71.875
2023-12-06	39	0	0	0	0	0	2	0	0	4	0	11	48	45	0.866667	0	0	0	0	0	0.0444444	0	0	0.0888889	0	0.282051	1.23077	0.955556	93.75
2023-12-13	3	0	0	0	0	0	0	0	4	0	0	0	2	7	0.428571	0	0	0	0	0	0	0	0.571429	0	0	0	0.666667	0.428571	18.5022
2023-12-20	85	0	0	0	0	0	3	1	6	0	0	0	27	95	0.894737	0	0	0	0	0	0.0315789	0.0105263	0.0631579	0	0	0	0.317647	0.905263	240.506
2023-01-03	34	0	0	0	0	0	2	0	1	0	0	0	14	37	0.918919	0	0	0	0	0	0.0540541	0	0.027027	0	0	0	0.411765	0.918919	115.625
2024-01-05	3	0	0	0	0	0	1	0	2	0	0	0	3	6	0.5	0	0	0	0	0	0.166667	0	0.333333	0	0	0	1	0.5	19.5652
2024-01-10	75	0	0	0	0	0	0	1	0	0	1	0	27	77	0.974026	0	0	0	0	0	0	0.012987	0	0	0.012987	0	0.36	1	120.312
2024-01-22	37	0	0	0	0	0	3	0	3	0	3	0	8	46															287.5
2024-04-12	19	0	0	0	0	0	8	1	15	0	0	0	11	43	0.44186	0	0	0	0	0	0.186047	0.0232558	0.348837	0	0	0	0.578947	0.465116	0.483263
2024-04-17	8	0	0	0	0	0	6	0	9	0	0	0	4	23	0.347826	0	0	0	0	0	0.26087	0	0.391304	0	0	0	0.5	0.347826	21.4953
2024-05-08	64	0	0	0	0	0	19	4	6	0	11	0	22	104	0.615385	0	0	0	0	0	0.182692	0.0384615	0.0576923	0	0.105769	0	0.34375	0.721154	162.5
2024-05-17	0	0	0	0	0	0	0	0	0	0	0	0	0	0															0
2024-05-21	6	0	0	0	0	0	0	0	0	0	0	0	4	6	1	0	0	0	0	0	0	0	0	0	0	0	0.666667	1	12.5
2024-11-08	3	0	0	0	0	0	0	0	6	0	0	0	1	9	0.333333	0	0	0	0	0	0	0	0.666667	0	0	0	0.333333	0.333333	14.0625
2024-11-21	20	0	0	0	0	0	0	2	0	0	0	0	3	22	0.909091	0	0	0	0	0	0	0.0909091	0	0	0	0	0.15	0.909091	45.8333
2024-12-12	29	0	0	0	0	2	1	0	0	0	4	0	7	36	0.805556	0	0	0	0	0.0555556	0.0277778	0	0	0	0.111111	0	0.241379	0.916667	72.4832
2025-02-26	29	0	0	0	0	0	0	0	1	0	2	0	2	32	0.90625	0	0	0	0	0	0	0	0.03125	0	0.0625	0	0.0689655	0.96875	66.6667
2025-03-05	7	0	0	0	0	0	0	0	2	0	0	0	0	9	0.777778	0	0	0	0	0	0	0	0.222222	0	0	0	0	0.777778	20.3774
2025-03-12	2	0	0	0	0	0	0	0	0	0	0	0	1	2	1	0	0	0	0	0	0	0	0	0	0	0	0.5	1	6.25
2025-03-19	2	0	0	0	0	0	0	0	2	0	0	0	0	4	0.5	0	0	0	0	0	0	0	0.5	0	0	0	0	0.5	12.5

## Sheet: Redirections
Date	Comp	ATO	SIB	PD	OA	IV	ARA	ST	NC	%AR-E	%AR-H	R+	P+	Total	Compliance	ATO	SIB	PD	OA	IV	ST	ARA	Behaviors of Noncompliance	Appropriate Requests for Break/Escape	Appropriate Requests for Help	Tangible	Attention R+	Appropriate Responses	Rate
2021-09-03	5	0	0	0	0	0	4	0	3	0	0	0	0	12	0.416667	0	0	0	0	0	0.333333	0	0.25	0	0	0	0	0.416667	19.3029
2021-09-28	2	0	0	0	0	0	1	0	3	0	0	0	0	6	0.333333	0	0	0	0	0	0.166667	0	0.5	0	0	0	0	0.333333	5.18732
2021-10-19	1	0	0	0	0	0	0	0	0	0	0	0	0	1	1	0	0	0	0	0	0	0	0	0	0	0	0	1	1.51515
2021-10-28	5	0	0	0	0	0	0	0	1	0	0	0	0	6	0.833333	0	0	0	0	0	0	0	0.166667	0	0	0	0	0.833333	#DIV/0!
2021-11-11	0	0	0	0	0	0	0	0	0	0	0	0	0	0															0
2021-12-02	0	0	0	0	0	0	0	0	0	0	0	0	0	0															0
2021-12-16	1	0	0	0	0	0	0	0	0	0	0	0	0	1	1	0	0	0	0	0	0	0	0	0	0	0	0	1	1.20482
2021-12-23	0	0	0	0	0	0	0	0	0	0	0	0	0	0															0
2022-01-05	1	0	0	0	0	0	2	0	0	0	0	0	1	3	0.333333	0	0	0	0	0	0.666667	0	0	0	0	0	1	0.333333	5.84416
2022-01-12	1	0	0	0	0	1	0	0	0	0	0	0	0	2	0.5	0	0	0	0	0.5	0	0	0	0	0	0	0	0.5	2.44399
2022-01-21	1	0	0	0	0	0	1	0	0	0	0	0	0	2	0.5	0	0	0	0	0	0.5	0	0	0	0	0	0	0.5	2.0202
2022-01-25	1	0	0	0	0	0	0	0	0	0	1	0	0	2	0.5	0	0	0	0	0	0	0	0	0	0.5	0	0	1	2.0202
2022-03-23	4	0	0	0	0	0	0	0	0	0	0	0	1	4	1	0	0	0	0	0	0	0	0	0	0	0	0.25	1	12.1212
2022-03-28	0	0	0	0	0	0	1	0	0	0	0	0	0	1	0	0	0	0	0	0	1	0	0	0	0			0	1.51515
2022-09-21	4	0	0	0	0	1	0	0	1	0	1	0	2	7	0.571429	0	0	0	0	0.142857	0	0	0.142857	0	0.142857	0	0.5	0.714286	14.5833
2022-09-23	1	0	0	0	0	0	0	0	0	0	0	0	1	1	1	0	0	0	0	0	0	0	0	0	0	0	1	1	1.14068
2022-09-27	3	0	0	0	0	0	0	0	0	0	2	0	0	5	0.6	0	0	0	0	0	0	0	0	0	0.4	0	0	1	4.57317
2022-10-06	1	0	0	0	0	0	0	0	0	0	0	0	0	1	1	0	0	0	0	0	0	0	0	0	0	0	0	1	1.51515
2022-10-21	2	0	0	0	0	0	0	0	0	0	1	0	1	3	0.666667	0	0	0	0	0	0	0	0	0	0.333333	0	0.5	1	3.94737
2022-10-28	1	0	0	0	0	0	0	0	0	0	0	0	1	1	1	0	0	0	0	0	0	0	0	0	0	0	1	1	1.51515
2022-11-11	11	0	0	0	0	2	0	0	0	0	3	0	1	16	0.6875	0	0	0	0	0.125	0	0	0	0	0.1875	0	0.0909091	0.875	26.087
2022-11-15	5	0	0	0	0	0	0	0	1	0	0	0	0	6	0.833333	0	0	0	0	0	0	0	0.166667	0	0	0	0	0.833333	6.06061
2022-11-22	5	0	0	0	0	0	0	0	0	0	0	0	2	5	1	0	0	0	0	0	0	0	0	0	0	0	0.4	1	5.98802
2022-12-02	8	0	0	0	0	3	0	0	0	1	1	0	2	13	0.615385	0	0	0	0	0.230769	0	0	0	0.0769231	0.0769231	0	0.25	0.769231	10.4839
2022-12-06	3	0	0	0	0	1	0	0	0	0	0	0	1	4	0.75	0	0	0	0	0.25	0	0	0	0	0	0	0.333333	0.75	8.88889
2022-12-21	0	0	0	0	0	0	0	0	0	0	0	0	0	0															0
2023-01-06	31	0	0	0	0	0	0	0	0	0	5	0	5	36	0.861111	0	0	0	0	0	0	0	0	0	0.138889	0	0.16129	1	54.5455
2023-01-30	9	0	0	0	0	0	0	0	0	0	0	0	6	9	1	0	0	0	0	0	0	0	0	0	0	0	0.666667	1	13.6364
2023-02-10	5	0	0	0	0	0	0	0	0	0	0	0	2	5	1	0	0	0	0	0	0	0	0	0	0	0	0.4	1	15.1515
2022-02-08	0	0	0	0	0	0	0	0	0	0	0	0	0	0															0
2023-03-06	2	0	0	0	0	0	0	0	0	0	0	0	1	2	1	0	0	0	0	0	0	0	0	0	0	0	0.5	1	5.15021
2023-03-24	0	0	0	0	0	0	0	0	0	0	0	0	0	0															0
2021-05-31	0	0	0	0	0	0	0	0	0	0	0	0	0	0															0
2021-06-16	6	0	0	0	0	4	0	0	2	0	0	0	1	12	0.5	0	0	0	0	0.333333	0	0	0.166667	0	0	0	0.166667	0.5	18.1818
2021-11-08	3	0	0	0	0	3	0	0	0	0	0	1	1	6	0.5	0	0	0	0	0.5	0	0	0	0	0	0.333333	0.333333	0.5	18.1818
2021-12-08	0	0	0	0	0	0	0	0	0	0	0	0	0	0															0
2022-06-07	2	0	0	0	0	0	1	0	0	0	0	0	0	3	0.666667	0	0	0	0	0	0.333333	0	0	0	0	0	0	0.666667	9.09091
2023-04-14	5	0	0	0	0	0	2	0	0	0	0	0	2	7	0.714286	0	0	0	0	0	0.285714	0	0	0	0	0	0.4	0.714286	8.55397
2023-05-01	5	0	0	0	0	0	0	0	0	0	0	0	0	5	1	0	0	0	0	0	0	0	0	0	0	0	0	1	6.34249
2023-05-12	3	0	0	0	0	0	0	0	0	0	0	0	1	3	1	0	0	0	0	0	0	0	0	0	0	0	0.333333	1	6.04027
2023-05-25	0	0	0	0	0	0	0	0	0	0	0	0	0	0															0
2023-07-19	6	0	0	0	0	0	0	0	0	0	0	0	5	6	1	0	0	0	0	0	0	0	0	0	0	0	0.833333	1	12.0805
2023-09-06	21	0	0	0	0	1	1	0	0	0	0	0	4	23	0.913043	0	0	0	0	0.0434783	0.0434783	0	0	0	0	0	0.190476	0.913043	34.8485
2023-09-15	9	0	0	0	0	0	0	0	0	0	0	0	3	9	1	0	0	0	0	0	0	0	0	0	0	0	0.333333	1	14.0625
2023-09-20	12	0	0	0	0	0	0	0	0	0	1	0	2	13	0.923077	0	0	0	0	0	0	0	0	0	0.0769231	0	0.166667	1	19.697
2023-09-27	0	0	0	0	0	0	0	0	0	0	0	0	0	0															0
2023-10-04	3	0	0	0	0	0	0	0	0	0	0	0	0	3	1	0	0	0	0	0	0	0	0	0	0	0	0	1	5.57276
2023-10-31	5	0	0	0	0	1	0	0	0	0	0	0	2	6	0.833333	0	0	0	0	0.166667	0	0	0	0	0	0	0.4	0.833333	8.25688
2023-11-10	2	0	0	0	0	0	0	0	0	0	0	0	2	2	1	0	0	0	0	0	0	0	0	0	0	0	1	1	3.125
2023-11-15	6	0	0	0	0	0	0	0	0	1	0	0	7	7	0.857143	0	0	0	0	0	0	0	0	0.142857	0	0	1.16667	1	10.9375
2023-12-06	3	0	0	0	0	0	1	0	0	0	0	0	4	4	0.75	0	0	0	0	0	0.25	0	0	0	0	0	1.33333	0.75	8.33333
2023-12-13	5	0	0	0	0	0	0	0	0	0	0	0	0	5	1	0	0	0	0	0	0	0	0	0	0	0	0	1	13.2159
2023-12-20	2	0	0	0	0	0	1	0	0	0	0	0	1	3	0.666667	0	0	0	0	0	0.333333	0	0	0	0	0	0.5	0.666667	7.59494
2023-01-03	0	0	0	0	0	0	0	0	0	0	0	0	0	0															0
2024-01-05	2	0	0	0	0	0	1	0	0	0	0	0	1	3	0.666667	0	0	0	0	0	0.333333	0	0	0	0	0	0.5	0.666667	9.78261
2024-01-10	3	0	0	0	0	0	0	0	0	0	0	0	1	3	1	0	0	0	0	0	0	0	0	0	0	0	0.333333	1	4.6875
2024-01-22	4	0	0	0	0	0	0	0	0	0	0	0	1	4	1	0	0	0	0	0	0	0	0	0	0	0	0.25	1	25
2024-04-12	1	0	0	0	0	0	0	0	0	0	0	0	1	1	1	0	0	0	0	0	0	0	0	0	0	0	1	1	0.483263
2024-04-17	1	0	0	0	0	0	0	0	0	0	0	0	0	1	1	0	0	0	0	0	0	0	0	0	0	0	0	1	0.934579
2024-05-08	1	0	0	0	0	0	0	0	0	0	1	0	0	2	0.5	0	0	0	0	0	0	0	0	0	0.5	0	0	1	3.125
2024-05-17	10	0	0	0	0	0	0	0	0	0	0	0	7	10	1	0	0	0	0	0	0	0	0	0	0	0	0.7	1	11.8577
2024-05-21	8	0	0	0	0	0	0	0	0	0	0	0	7	8	1	0	0	0	0	0	0	0	0	0	0	0	0.875	1	16.6667
2024-11-08	1	0	0	0	0	0	0	0	0	0	0	0	1	1	1	0	0	0	0	0	0	0	0	0	0	0	1	1	1.5625
2024-11-21	1	0	0	0	0	0	0	0	0	0	0	0	0	1	1	0	0	0	0	0	0	0	0	0	0	0	0	1	2.08333
2024-12-12	10	0	0	0	0	0	0	0	0	0	1	0	3	11	0.909091	0	0	0	0	0	0	0	0	0	0.0909091	0	0.3	1	22.1477
2025-02-26	17	0	0	0	0	0	0	0	0	0	2	0	4	19	0.894737	0	0	0	0	0	0	0	0	0	0.105263	0	0.235294	1	39.5833
2025-03-05	18	0	0	0	0	0	0	0	0	0	1	0	6	19	0.947368	0	0	0	0	0	0	0	0	0	0.0526316	0	0.333333	1	43.0189
2025-03-12	5	0	0	0	0	0	0	0	0	0	1	0	0	6	0.833333	0	0	0	0	0	0	0	0	0	0.166667	0	0	1	18.75
2025-03-19	3	0	0	0	0	0	0	0	0	0	0	0	1	3	1	0	0	0	0	0	0	0	0	0	0	0	0.333333	1	9.375

## Sheet: Reciprocity
DATE	%Correct	2	3	4	5	6	7	E/ST/NC	Request Help	Request Escape	3 or more	P+	R+	Rate
2021-09-03														0
2021-09-28
2021-10-19
2021-10-28
2021-11-11
2021-12-02
2021-12-16
2021-12-23
2022-01-05
2022-01-12
2022-01-21	0.291667	0.208333	0.0833333	0	0	0	0	0.708333	0	0.0833333	0.0833333	1.28571	0	24.2424
2022-01-25	0.473684	0.473684	0	0	0	0	0	0.526316	0	0	0	0.555556	0	19.1919
2022-03-23
2022-03-28
2022-09-21
2022-09-23
2022-09-27
2022-10-06
2022-10-21
2022-10-28
2022-11-11
2022-11-15
2022-11-22
2022-12-02	0.642857	0.285714	0.214286	0	0	0	0.142857	0.357143	0	0.357143	0.357143	0.444444	0	11.2903
2022-12-06
2022-12-21
2023-01-06
2023-01-30
2023-02-10
2022-02-08
2023-03-06
2023-03-24
2021-05-31
2021-06-16
2021-11-08
2021-12-08
2022-06-07
2023-04-14
2023-05-01
2023-05-12
2023-05-25
2023-07-19	#DIV/0!	#DIV/0!	#DIV/0!	#DIV/0!	0	#DIV/0!	#DIV/0!	0	#DIV/0!	0.333333	0.375			32.2148
2023-09-06
2023-09-15
2023-09-20	0.432099	0.259259	0.0493827	0.0740741	0.0493827	0	0	0.567901	0.444444	0.17284	0.17284	0	0	109.459
2023-09-27
2023-10-04
2023-10-31	0.615385	0.192308	0.230769	0.134615	0.0576923	0	0	0.384615	0	0.423077	0.423077	0	0	143.119
2023-11-10
2023-11-15	0.484848	0.242424	0.121212	0.0606061	0	0	0.0606061	0.515152	0.181818	0.242424	0.242424	0	0	51.5625
2023-12-06	0.662722	0.272189	0.254438	0.0828402	0.035503	0.0177515	0	0.337278	0.100592	0.390533	0.390533	0.419643	0	23.0982
2023-12-13	0.5	0.5	0	0	0	0	0	0.5	0	0	0	1	0	5.28634
2023-12-20	0.657343	0.237762	0.286713	0.0699301	0.041958	0.020979	0	0.342657	0.118881	0.41958	0.41958	0.414894	0	21.8824
2023-01-03	0.777778	0.444444	0.111111	0.222222	0	0	0	0.222222	0	0.333333	0.333333	0.428571	0	56.25
2024-01-05														0
2024-01-10	0.809524	0.047619	0.571429	0.047619	0.142857	0	0	0.190476	0.0952381	0.761905	0.761905	0.764706	0	32.8125
2024-01-22	0.538462	0.0769231	0.307692	0.153846	0	0	0	0.461538	0.230769	0.461538	0.461538	0.285714	0	81.25
2024-04-12	0.285714	0.142857	0.0714286	0	0.0714286	0	0	0.714286	0	0.142857	0.142857	1	0	28.9698
2024-04-17	0.5	0.3	0.2	0	0	0	0	0.5	0	0.2	0.2	0.4	0	9.34579
2024-05-08	0.642857	0.25	0.25	0.0714286	0.0357143	0.0357143	0	0.357143	0.214286	0.392857	0.392857	0.388889	0	87.5
2024-05-17														0
2024-05-21	1	0	1	0	0	0	0	0	0	1	1	0	0	4.16667
2024-11-08	1	1	0	0	0	0	0	0	0	0	0	1	0	1.5625
2024-11-21	0.944444	0.555556	0.166667	0.166667	0	0.0555556	0	0.0555556	0	0.388889	0.388889	0.0588235	0	37.5
2024-12-12	0.7	0.3	0.4	0	0	0	0	0.3	0	0.4	0.4	0.285714	0	17.341

## Sheet: Requests-R+
Date		AR-Items/Acts	Attention Reinforcement	Tangible Reinforcement				Date		AR-Attention						Date	Daye	AR-Help						Date		AR-Escape/Break						Date		AR-Total			Date	Attention-Based R+	Tangible	%F+I	%F+A	%F+H	%F+B	%F+
2021-09-03	1	0	6.43432	1.60858				2021-09-03	1	0						2021-09-03	1	0						2021-09-03	1	0						2021-09-03	1	0			2021-09-03	0	0					0
2021-09-28	2	0	18.1556	0				2021-09-28	2	0						2021-09-28	2	0						2021-09-28	2	0						2021-09-28	2	0			2021-09-28	0	0					0
2021-10-19	3	0	0	0				2021-10-19	3	0						2021-10-19	3	0						2021-10-19	3	0						2021-10-19	3	0			2021-10-19	0	0					0
2021-10-28	4	0	6.59341	0				2021-10-28	4	0						2021-10-28	4	0						2021-10-28	4	0						2021-10-28	4	0			2021-10-28	0	0					0
2021-11-11	5	0	2.41935	0				2021-11-11	5	0						2021-11-11	5	0						2021-11-11	5	0						2021-11-11	5	0			2021-11-11	0	0					0
2021-12-02	6	0	14.8041	1.74165				2021-12-02	6	0						2021-12-02	6	0						2021-12-02	6	0						2021-12-02	6	0			2021-12-02
2021-12-16	7	0	15.6627	0				2021-12-16	7	0						2021-12-16	7	0						2021-12-16	7	0						2021-12-16	7	0			2021-12-16	0	0					0
2021-12-23	8	0	15.6134	0				2021-12-23	8	0						2021-12-23	8	0						2021-12-23	8	0						2021-12-23	8	0			2021-12-23	0	0					0
2022-01-05	9	0	87.6623	1.94805				2022-01-05	9	0						2022-01-05	9	0						2022-01-05	9	0						2022-01-05	9	0			2022-01-05	0	0					0
2022-01-12	10	0	14.664	0				2022-01-12	10	0						2022-01-12	10	0						2022-01-12	10	0						2022-01-12	10	0			2022-01-12	0	0					0
2022-01-21	11	0	77.7778	6.06061				2022-01-21	11	0						2022-01-21	11	0						2022-01-21	11	0						2022-01-21	11	0			2022-01-21	0	0					0
2022-01-25	12	0	77.7778	2.0202				2022-01-25	12	0						2022-01-25	12	0						2022-01-25	12	0						2022-01-25	12	0			2022-01-25	0	0					0
2022-03-23	13	0	30.303	0				2022-03-23	13	0						2022-03-23	13	0						2022-03-23	13	0						2022-03-23	13	0			2022-03-23	0	0					0
2022-03-28	14	0	48.4848	1.51515				2022-03-28	14	0						2022-03-28	14	0						2022-03-28	14	0						2022-03-28	14	0			2022-03-28	0	0					0
2022-09-21	15	4.54545	52.0833	4.16667				2022-09-21	15	0						2022-09-21	15	6.06061						2022-09-21	15	4.54545						2022-09-21	15	15.1515			2022-09-21	0	0	0.4	5	0.5	0	0.888889
2022-09-23	16	0	63.8783	11.4068				2022-09-23	16	0						2022-09-23	16	0						2022-09-23	16	0						2022-09-23	16	0			2022-09-23	0	0	0	1.2	0		0.545455
2022-09-27	17	0	53.0488	4.57317				2022-09-27	17	0						2022-09-27	17	0						2022-09-27	17	0						2022-09-27	17	0			2022-09-27	0.0769231	0		0.833333	0	0.25	0.461538
2022-10-06	18	0	95.4545	10.6061				2022-10-06	18	0						2022-10-06	18	0						2022-10-06	18	0						2022-10-06	18	0			2022-10-06	0	0	0		0	0	0
2022-10-21	19	1.31579	82.8947	19.7368				2022-10-21	19	11.8421						2022-10-21	19	11.8421						2022-10-21	19	0						2022-10-21	19	25			2022-10-21	0.263158	0	0	0.888889	0		0.421053
2022-10-28	20	0	10.6061	0				2022-10-28	20	0						2022-10-28	20	0						2022-10-28	20	0						2022-10-28	20	0			2022-10-28	0.05	0	0.5	0	0.166667		0.1
2022-11-11	21	4.0404	128.804	16.3043				2022-11-11	21	22.2222						2022-11-11	21	2.0202						2022-11-11	21	5.05051						2022-11-11	21	33.3333			2022-11-11	0.155556	0	1	0.566667	0	0	0.422222
2022-11-15	22		86.8687	4.0404				2022-11-15	22	0						2022-11-15	22	0						2022-11-15	22	0						2022-11-15	22				2022-11-15	0.0909091	0	0.25	0.772727	0.5	0.2	0.606061
2022-11-22	23	1.1976	3.5	2.5				2022-11-22	23	4.79042						2022-11-22	23	2.39521						2022-11-22	23	1.1976						2022-11-22	23	9.58084			2022-11-22	0.125	0	1	0.5	1	1	0.75
2022-12-02	24	0	36.2903	4.03226				2022-12-02	24	0						2022-12-02	24	0						2022-12-02	24	0						2022-12-02	24	0			2022-12-02	0.16	0	0	0.5	0.6	0	0.4
2022-12-06	25	0	68.8889	0				2022-12-06	25	0						2022-12-06	25	0						2022-12-06	25	0						2022-12-06	25	0			2022-12-06	0.194805	0	0	0.545455	0.625	0	0.363636
2022-12-21	26	0	24.2424	0				2022-12-21	26	0						2022-12-21	26	0						2022-12-21	26	0						2022-12-21	26	0			2022-12-21	0.266667	0	0.5	0.846154	0.571429	0.666667	0.733333
2023-01-06	27	0	48.4848	4.54545				2023-01-06	27	0						2023-01-06	27	0						2023-01-06	27	0						2023-01-06	27	0			2023-01-06	0.125	0	0.785714	0.5	0.833333	1	0.791667
2023-01-30	28	0	66.6667	0				2023-01-30	28	0						2023-01-30	28	0						2023-01-30	28	0						2023-01-30	28	0			2023-01-30	0.117647	0		0.909091	0.833333		0.882353
2023-02-10	29	0	106.061	0				2023-02-10	29	0						2023-02-10	29	0						2023-02-10	29	0						2023-02-10	29	0			2023-02-10	0	0	1	1	0.6	1	0.8
2022-02-08	30	6	39.3939	0				2022-02-08	30	48						2022-02-08	30	6						2022-02-08	30	30						2022-02-08	30	90			2022-02-08
2023-03-06	31	0	118.455	0				2023-03-06	31	0						2023-03-06	31	0						2023-03-06	31	0						2023-03-06	31	0			2023-03-06	0.2	0	1	0.75	1	0.5	0.8
2023-03-24	32	0	66	0				2023-03-24	32	0						2023-03-24	32	0						2023-03-24	32	0						2023-03-24	32	0			2023-03-24	0.0666667	0	3	0.125	1	0.2	0.4
2021-05-31	33	0	3.0303	0				2021-05-31	33	1.51515						2021-05-31	33	3.0303						2021-05-31	33	0						2021-05-31	33	4.54545			2021-05-31	0	0					0
2021-06-16	34	0	2.0202	1.0101				2021-06-16	34	0						2021-06-16	34	0						2021-06-16	34	0						2021-06-16	34	0			2021-06-16	0	0					0
2021-11-08	35	0	9.09091	6.06061				2021-11-08	35	0						2021-11-08	35	0						2021-11-08	35	0						2021-11-08	35	0			2021-11-08	0	0					0
2021-12-08	36	0	13.3333	3.33333				2021-12-08	36	0						2021-12-08	36	0						2021-12-08	36	0						2021-12-08	36	0			2021-12-08	0	0					0
2022-06-07	37	0	24.2424	0				2022-06-07	37	0						2022-06-07	37	0						2022-06-07	37	0						2022-06-07	37	0			2022-06-07	0	0					0
2023-04-14	38	0	17.1079	0				2023-04-14	38	0						2023-04-14	38	0						2023-04-14	38	0						2023-04-14	38	0			2023-04-14	0	0		1	1		0.2
2023-05-01	39	3.0303	25.37	0				2023-05-01	39	21.2121						2023-05-01	39	13.6364						2023-05-01	39	1.51515						2023-05-01	39	39.3939			2023-05-01	0.222222	0	0	0.0909091	1	0.428571	0.407407
2023-05-12	40	1.51515	76.5101	0				2023-05-12	40	21.2121						2023-05-12	40	39.3939						2023-05-12	40	0						2023-05-12	40	62.1212			2023-05-12	0.0869565	0	1	0.8	1	1	0.869565
2023-05-25	41	8	21.2121	0				2023-05-25	41	4						2023-05-25	41	4						2023-05-25	41	4						2023-05-25	41	20			2023-05-25	0.153846	0	0.5	0.888889	1	1	0.846154
2023-07-19	42	0	142.953	0				2023-07-19	42	0						2023-07-19	42	0						2023-07-19	42	0						2023-07-19	42	0			2023-07-19	0.235294	0		1	0.9	1	0.941176
2023-09-06	43	0	92.4242	0				2023-09-06	43	0						2023-09-06	43	0						2023-09-06	43	0						2023-09-06	43	0			2023-09-06	0.176471	0	0.571429	0.8	0.777778	1	0.764706
2023-09-15	44	1.5625	46.875	0				2023-09-15	44	3.125						2023-09-15	44	6.25						2023-09-15	44	4.6875						2023-09-15	44	15.625			2023-09-15	0.181818	0	1	0.5	0.8	1	0.818182
2023-09-20	45	1.51515	74.2424	0				2023-09-20	45	21.2121						2023-09-20	45	39.3939						2023-09-20	45	0						2023-09-20	45	62.1212			2023-09-20	0.288889	0	1	1.07143	0.964286		1
2023-09-27	46	8	28	0				2023-09-27	46	4						2023-09-27	46	4						2023-09-27	46	4						2023-09-27	46	20			2023-09-27	0.2	0	1	1	1	1	0
2023-10-04	47	0	89.1641	0				2023-10-04	47	5.57276						2023-10-04	47	1.85759						2023-10-04	47	1.85759						2023-10-04	47	9.28793			2023-10-04	0.5	0	1	0.666667	1	1	0.875
2023-10-31	48	0	86.6972	0				2023-10-31	48	22.6891						2023-10-31	48	5.04202						2023-10-31	48	0						2023-10-31	48	27.7311			2023-10-31	0.225	0	1	0.652174	0.555556	0.5	0.675
2023-11-10	49	0	42.1875	0				2023-11-10	49	4.6875						2023-11-10	49	1.5625						2023-11-10	49	3.125						2023-11-10	49	9.375			2023-11-10	0.111111	0		1	1	1	1
2023-11-15	50	10.9375	87.5	0				2023-11-15	50	32.8125						2023-11-15	50	21.875						2023-11-15	50	4.6875						2023-11-15	50	70.3125			2023-11-15	0.26	0	0.5	0.666667	0.9375	1	0.76
2023-12-06	51	0	54.1667	0				2023-12-06	51	25						2023-12-06	51	16.6667						2023-12-06	51	4.16667						2023-12-06	51	45.8333			2023-12-06	0.12	0	1	0.75	0.5	0.666667	0.44
2023-12-13	52	0	37.0044	0				2023-12-13	52	2.64317						2023-12-13	52	2.64317						2023-12-13	52	2.64317						2023-12-13	52	7.92952			2023-12-13	0	0		1	0	1	0.666667
2023-12-20	53	0	111.392	0				2023-12-20	53	35.443						2023-12-20	53	5.06329						2023-12-20	53	2.53165						2023-12-20	53	43.038			2023-12-20	0	0	0	0.588235	0	0	0.434783
2023-01-03	54	3.125	75	0				2023-01-03	54	6.25						2023-01-03	54	0						2023-01-03	54	0						2023-01-03	54	9.375			2023-01-03	0	0	1	1			1
2024-01-05	55	0	32.6087	0				2024-01-05	55	6.52174						2024-01-05	55	0						2024-01-05	55	0						2024-01-05	55	6.52174			2024-01-05	0	0		1			1
2024-01-10	56	1.5625	68.75	0				2024-01-10	56	17.1875						2024-01-10	56	6.25						2024-01-10	56	0						2024-01-10	56	25			2024-01-10	0.210526	0	1	0.846154	0.8		0.842105
2024-01-22	57	0	87.5	0				2024-01-22	57	25						2024-01-22	57	18.75						2024-01-22	57	12.5						2024-01-22	57	56.25			2024-01-22
2024-04-12	58	0	47.5932	0				2024-04-12	58	24.8312						2024-04-12	58	0						2024-04-12	58	2.06927						2024-04-12	58	26.9005			2024-04-12	0.222222	0	1	0.384615		0.75	0.5
2024-04-17	59	0	56.0748	0				2024-04-17	59	21.4953						2024-04-17	59	6.54206						2024-04-17	59	0						2024-04-17	59	28.0374			2024-04-17	0.236842	0	1	0.875	0.857143	1	0.894737
2024-05-08	60	0	65.625	0				2024-05-08	60	89.0625						2024-05-08	60	28.125						2024-05-08	60	0						2024-05-08	60	117.188			2024-05-08	0.047619	0	0	0.730159	0.85		0.75
2024-05-17	61	0	74.7036	0				2024-05-17	61	11.6883						2024-05-17	61	7.79221						2024-05-17	61	7.79221						2024-05-17	61	27.2727			2024-05-17	0.136364	0		0.666667	0.909091	0.4	0.727273
2024-05-21	62	0	131.25	0				2024-05-21	62	22.9167						2024-05-21	62	18.75						2024-05-21	62	0						2024-05-21	62	41.6667			2024-05-21	0.0263158	0	1	1	0.777778		0.5
2024-11-08	63	0	32.8125	0				2024-11-08	63	4.6875						2024-11-08	63	1.5625						2024-11-08	63	0						2024-11-08	63	6.25			2024-11-08	0	0		1	1		1
2024-11-21	64	10.4167	39.5833	0				2024-11-21	64	89.5833						2024-11-21	64	2.08333						2024-11-21	64	0						2024-11-21	64	102.083			2024-11-21	0.0925926	0	0.875	0.767442	0.666667		0.777778
2024-12-12	65	2.01342	72.4832	0				2024-12-12	65	16.1074						2024-12-12	65	36.2416						2024-12-12	65	0						2024-12-12	65	54.3624			2024-12-12	0.138889	0	1	0.818182	0.818182		0.833333
2025-02-26	66	0	43.75	0				2025-02-26	66	6.25						2025-02-26	66	22.9167						2025-02-26	66	0						2025-02-26	66	29.1667			2025-02-26	0.0363636	0	1	1	0.857143	#DIV/0!	0.309091
2025-03-05	67	0	27.1698	0				2025-03-05	67	9.0566						2025-03-05	67	31.6981						2025-03-05	67	2.26415						2025-03-05	67	43.0189			2025-03-05	0	0	#DIV/0!	0.75	0.555556	0	0.342105
2025-03-12	68	0	37.5	0				2025-03-12	68	9.375						2025-03-12	68	6.25						2025-03-12	68	0						2025-03-12	68	15.625			2025-03-12	0.166667	0	#DIV/0!	0.666667	0	#DIV/0!	0.666667
2025-03-19	69	0	40.625	0				2025-03-19	69	6.25						2025-03-19	69	28.125						2025-03-19	69	0						2025-03-19	69	34.375			2025-03-19	0	0	#DIV/0!	1	0.888889	#DIV/0!	0.909091
